# Supplementary material for: Optimal timing of rectal diclofenac in preventing post-endoscopic retrograde cholangiopancreatography pancreatitis
Source: PubMed Central journal article supplement — Endosc Int Open. 2022 Mar 14;10(3):E246–53. doi: 10.1055/a-1675-2108 (PMC8920594; doi:10.1055/a-1675-2108), 2022-03-14
Supplement: 2426supmat_10-1055-a-1675-2108.pdf [file 2426supmat_10-1055-a-1675-2108.pdf]

## Supplementary material

**Table S1. ERCP Characteristics**

|                                                     | Pre ERCP<br>(N=346) | Post ERCP<br>(N=63) | P Value           |
|-----------------------------------------------------|---------------------|---------------------|-------------------|
| Type of sedation                                    |                     |                     | 0.09*             |
| Midazolam                                           | 183                 | 36                  |                   |
| Propofol                                            | 216                 | 27                  |                   |
| General anesthesia                                  | 7                   | 0                   |                   |
| Trainee involvement                                 | 30 (9%)             | 4 (6%)              | 0.80*             |
| (unintentional) Pancreatic duct contrast injections | 58 (17%)            | 13 (21%)            | 0.59              |
| Biliary sphincterotomy                              | 291 (84%)           | 52 (83%)            | 0.90 <sup>#</sup> |
| Precut sphincterotomy                               | 44 (13%)            | 7 (11%)             | 0.88 <sup>#</sup> |
| Biliary balloon sphincter dilatation                | 26 (8%)             | 3 (5%)              | 0.60*             |
| Pancreatic sphincterotomy                           | 2 (<1%)             | 1 (2%)              | 0.40*             |
| Brush cytology bile duct                            | 21 (6%)             | 3 (5%)              | 1.00*             |
| Bile duct stent placement                           | 44 (13%)            | 9 (14%)             | 0.91 <sup>#</sup> |
| Balloon dilatation stenosis bile duct               | 8 (2%)              | 1 (2%)              | 1.00*             |

Data are median (IQR) or n (%). <sup>°</sup> Wilcoxon rank sum test, <sup>#</sup> Chi-squared test, \* Fisher exact test. ERCP denotes endoscopic retrograde cholangiopancreatography.
